# Supplementary material
Source: PubMed Central journal article supplement (PMC3091993)
Supplement: NIHMS265817-supplement-Supp_Table_S1-_S3.pdf [file NIHMS265817-supplement-Supp_Table_S1-_S3.pdf]

**Table S1. Pairwise statistical analysis of Rasgrf1 transcript levels in olfactory bulb.**

*Rasgrf1* transcript levels in P8 neonatal olfactory bulb were quantified for each genotype tested (see Methods). Transcript levels found in each genotype were compared using Student's *t*-test; alpha levels were Bonferroni-corrected for ten multiple comparisons such that  $p < 0.005$  indicates significance. The *t*-statistic and *p*-value for each pairwise comparison are depicted (df = 26 in all cases).

| <i>t</i> statistic<br>p-value | B  | MM                         | +/ <i>tm2</i>              | MP                         | N                           |
|-------------------------------|----|----------------------------|----------------------------|----------------------------|-----------------------------|
| B                             | -- | $t = 3.60$<br>$p = 0.0013$ | $t = 4.74$<br>$p < 0.0001$ | $t = 0.25$<br>$p = 0.8007$ | $t = 12.73$<br>$p < 0.0001$ |
| MM                            |    | --                         | $t = 1.14$<br>$p = 0.2655$ | $t = 3.48$<br>$p = 0.0018$ | $t = 9.13$<br>$p < 0.0001$  |
| +/ <i>tm2</i>                 |    |                            | --                         | $t = 4.66$<br>$p < 0.0001$ | $t = 7.99$<br>$p < 0.0001$  |
| MP                            |    |                            |                            | --                         | $t = 12.96$<br>$p < 0.0001$ |

**Table S2. Pairwise statistical analysis of *Rasgrf1* transcript levels in hippocampus.**

*Rasgrf1* transcript levels in P8 neonatal hippocampus were quantified for each genotype tested (see Methods). Transcript levels found in each genotype were compared using Student's *t*-test; alpha levels were Bonferroni-corrected for ten multiple comparisons such that  $p < 0.005$  indicates significance. The *t*-statistic and *p*-value for each pairwise comparison are depicted (df = 26 in all cases).

| <i>t</i> statistic<br><b>p-value</b> | <b>B</b> | <b>MM</b>                  | <b>+/<i>tm2</i></b>        | <b>MP</b>                  | <b>N</b>                    |
|--------------------------------------|----------|----------------------------|----------------------------|----------------------------|-----------------------------|
| <b>B</b>                             | --       | $t = 5.83$<br>$p < 0.0001$ | $t = 8.07$<br>$p < 0.0001$ | $t = 3.38$<br>$p = 0.0023$ | $t = 28.04$<br>$p < 0.0001$ |
| <b>MM</b>                            |          | --                         | $t = 2.24$<br>$p = 0.0338$ | $t = 2.67$<br>$p = 0.0128$ | $t = 22.21$<br>$p < 0.0001$ |
| <b>+/<i>tm2</i></b>                  |          |                            | --                         | $t = 5.00$<br>$p < 0.0001$ | $t = 19.97$<br>$p < 0.0001$ |
| <b>MP</b>                            |          |                            |                            | --                         | $t = 25.72$<br>$p < 0.0001$ |

**Table S3. Pairwise statistical analysis of *Rasgrf1* transcript levels in the remainder of the brain.** *Rasgrf1* transcript levels in the remainder of the P8 neonatal brain (ROB, comprising the whole brain excepting olfactory bulbs, hippocampus, hypothalamus and pituitary gland; see Methods for details) were quantified for each genotype tested (see Methods). Transcript levels found in each genotype were compared using Students *t*-test; alpha levels were Bonferroni-corrected for ten multiple comparisons such that  $p < 0.005$  indicates significance. The *t*-statistic and *p*-value for each pairwise comparison are depicted (df = 26 in all cases).

| <i>t</i> statistic<br><b>p-value</b> | <b>B</b> | <b>MM</b>                  | <b>+/<i>tm2</i></b>         | <b>MP</b>                   | <b>N</b>                    |
|--------------------------------------|----------|----------------------------|-----------------------------|-----------------------------|-----------------------------|
| <b>B</b>                             | --       | $t = 6.51$<br>$p < 0.0001$ | $t = 13.53$<br>$p < 0.0001$ | $t = 3.67$<br>$p = 0.0011$  | $t = 37.65$<br>$p < 0.0001$ |
| <b>MM</b>                            |          | --                         | $t = 7.02$<br>$p < 0.0001$  | $t = 3.09$<br>$p = 0.0047$  | $t = 31.14$<br>$p < 0.0001$ |
| <b>+/<i>tm2</i></b>                  |          |                            | --                          | $t = 10.37$<br>$p < 0.0001$ | $t = 24.12$<br>$p < 0.0001$ |
| <b>MP</b>                            |          |                            |                             | --                          | $t = 35.40$<br>$p < 0.0001$ |
